# Supplementary material for: Robust reagent addition and perfusion strategies for droplet-interface bilayers
Source: Royal Society of Chemistry journal article supplement (doi:10.1039/c3lc41323c), 2013-01-01
Supplement: c3lc41323c.pdf [file c3lc41323c.pdf]

# Robust Reagent Addition and Perfusion Strategies for Droplet-Interface Bilayers

Max Lein, ‡<sup>a</sup> Jing Huang ‡<sup>a</sup> and Matthew A. Holden\*<sup>a</sup>

Received (in XXX, XXX) Xth XXXXXXXXXX 20XX, Accepted Xth XXXXXXXXXX 20XX

DOI: 10.1039/b000000x

## Electronic Supplementary Information

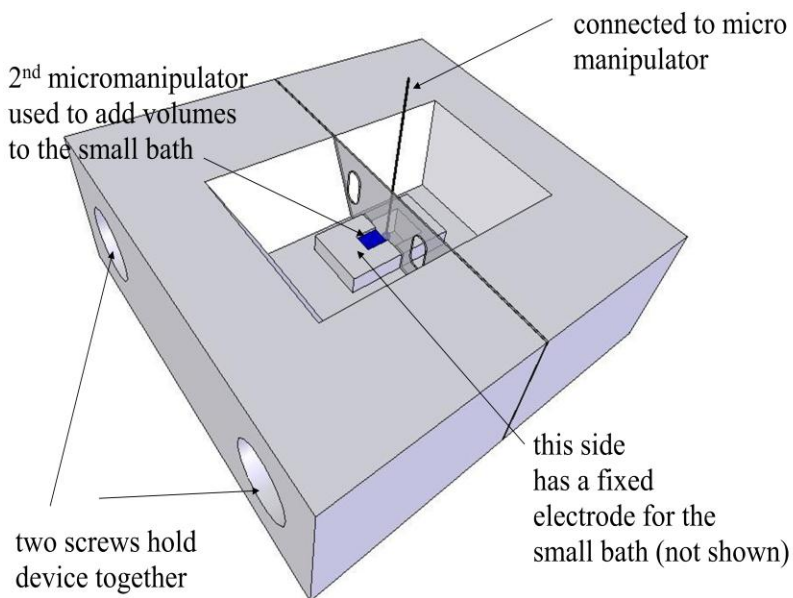

**Figure S1:** Diagram of the add-chip. The two halves are separated by a Teflon film with an aperture between the small bath and the movable droplet.

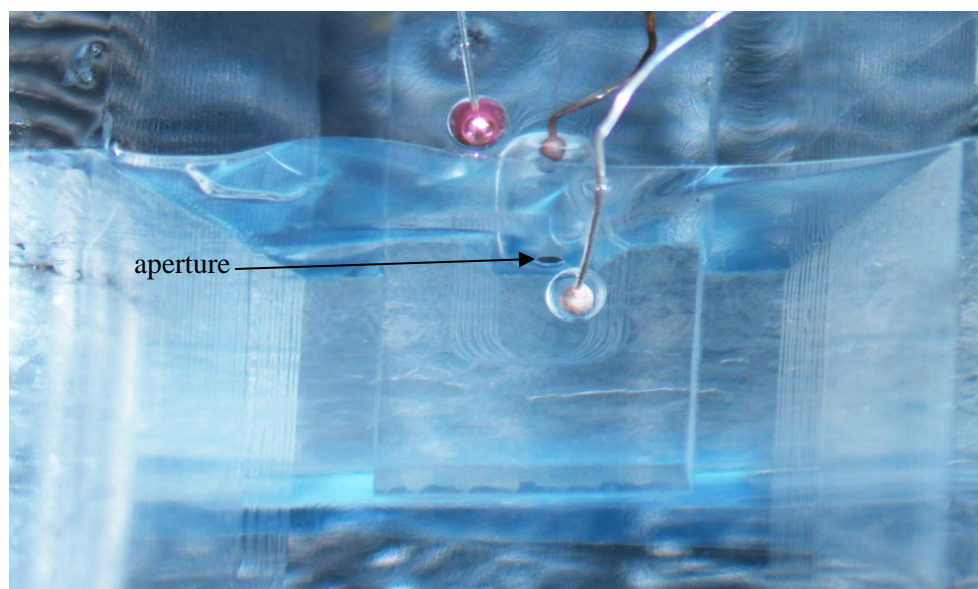

**Figure S2:** View from top, approximately 20° from normal, prior to DIB formation. Slight bending in the Teflon film at the top of the device is normal and does not affect DIB formation.

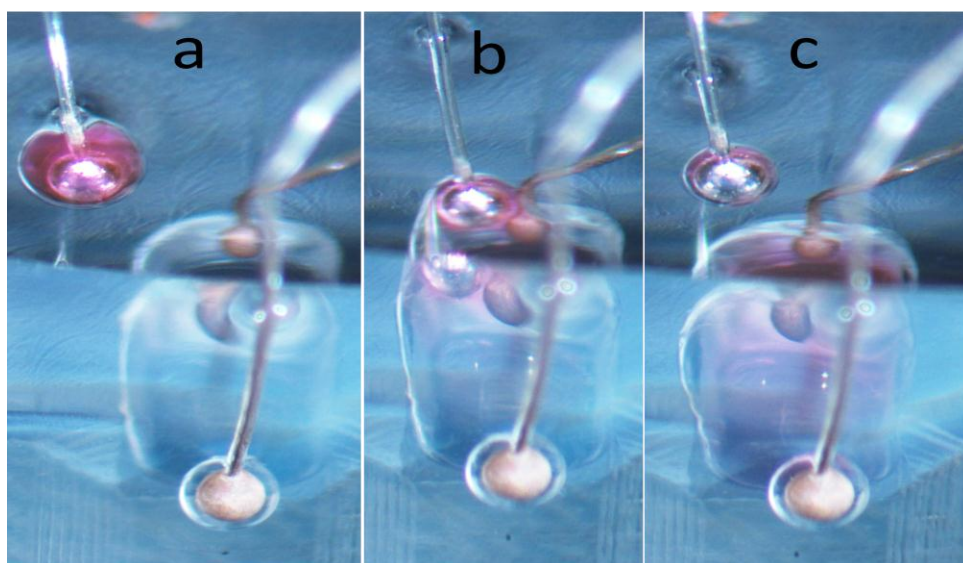

**Figure S3:** Demonstration of the add-chip before and after reagent addition. a) A bilayer has formed between the 200nL droplet and well. A 200 nL droplet of dye was suspended from the ball-ended silver wire, ready to add. b) Immediately after dye solution was added to the well. c) The wire was removed without perturbing the DIB. The wire can be re-loaded or replaced and used for another reagent addition.

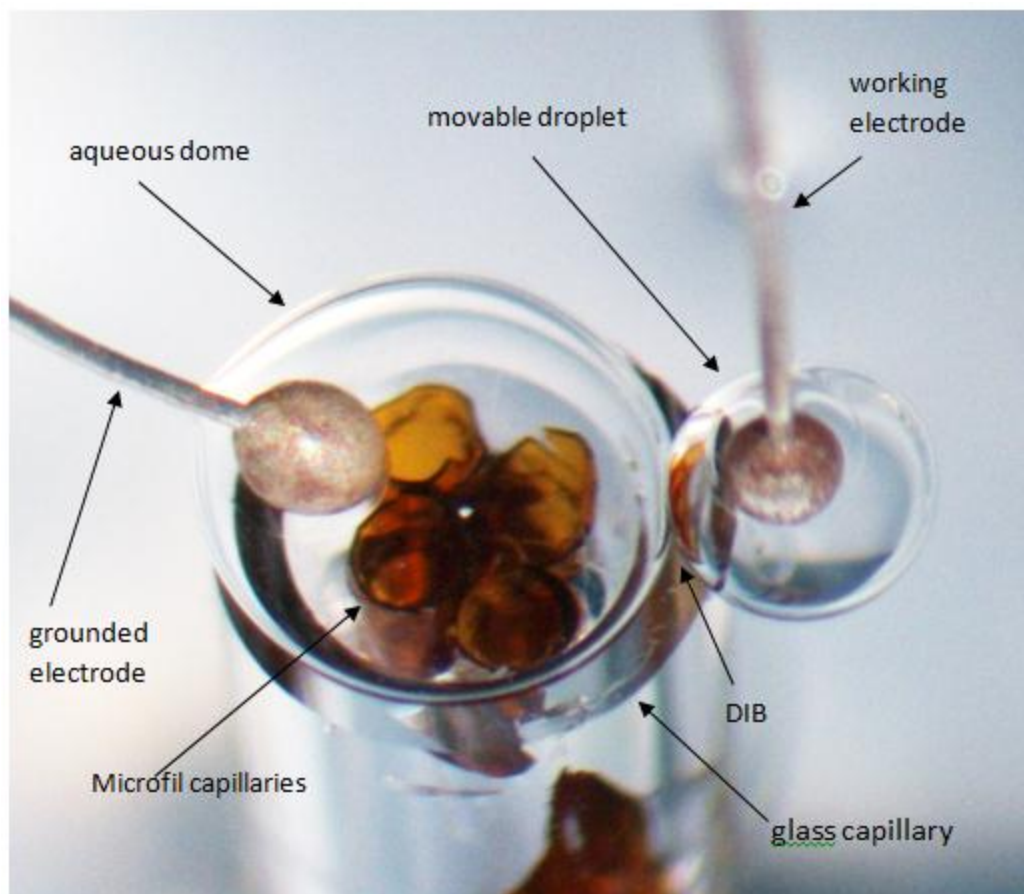

**Figure S4:** Flow-chip with assembled DIB. Here, the device is viewed at an angle approximately 45° from the axis of the glass capillary.
